# Supplementary material for: Comprehensive analyses of tumor immunity: implications for cancer immunotherapy
Source: PubMed Central journal article supplement (PMC4993001; doi:10.1186/s13059-016-1028-7), 2016-08-22

Figure S1

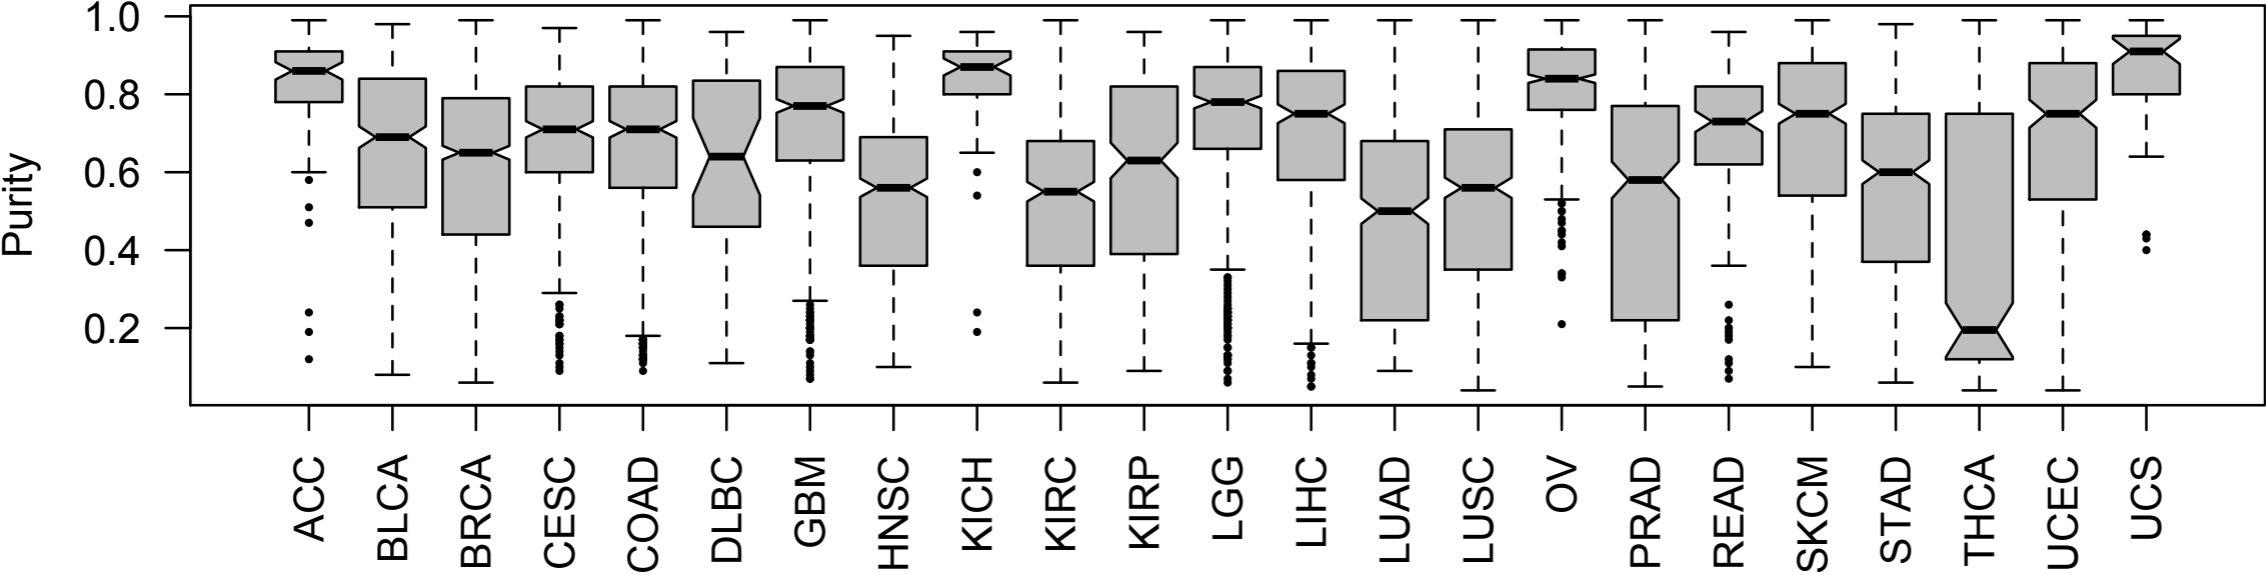

**Figure S2**

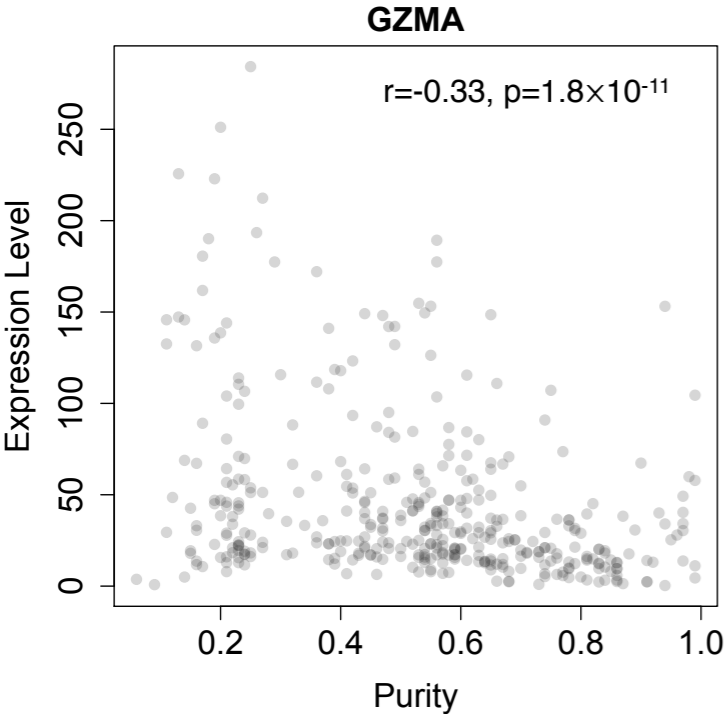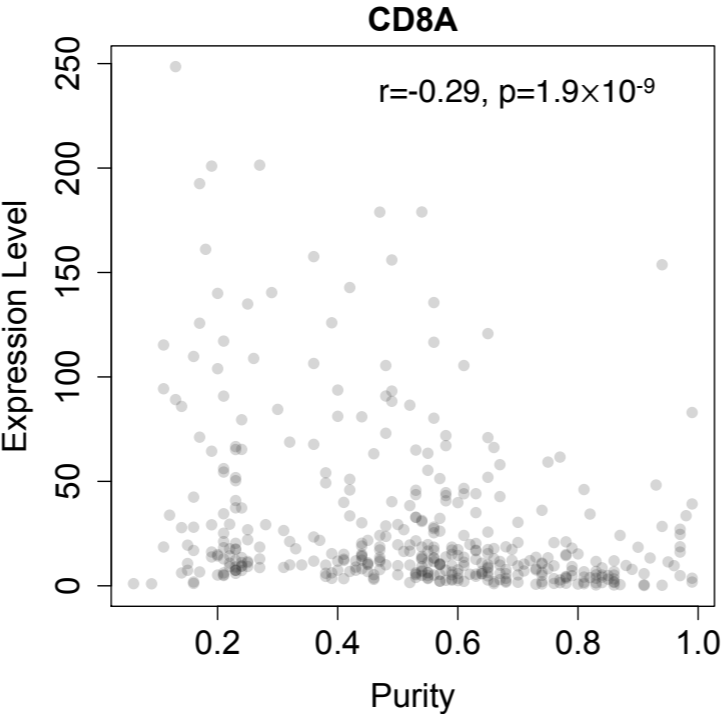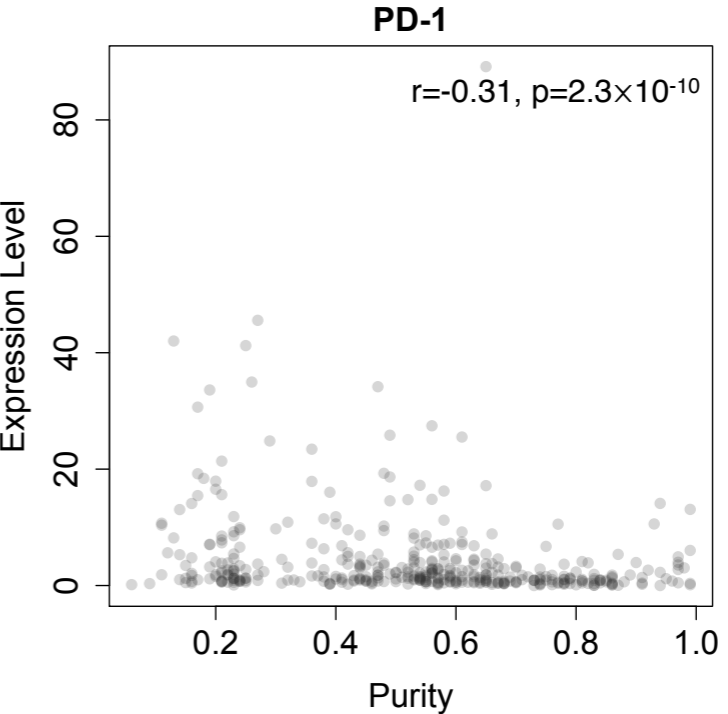

**Figure S3**

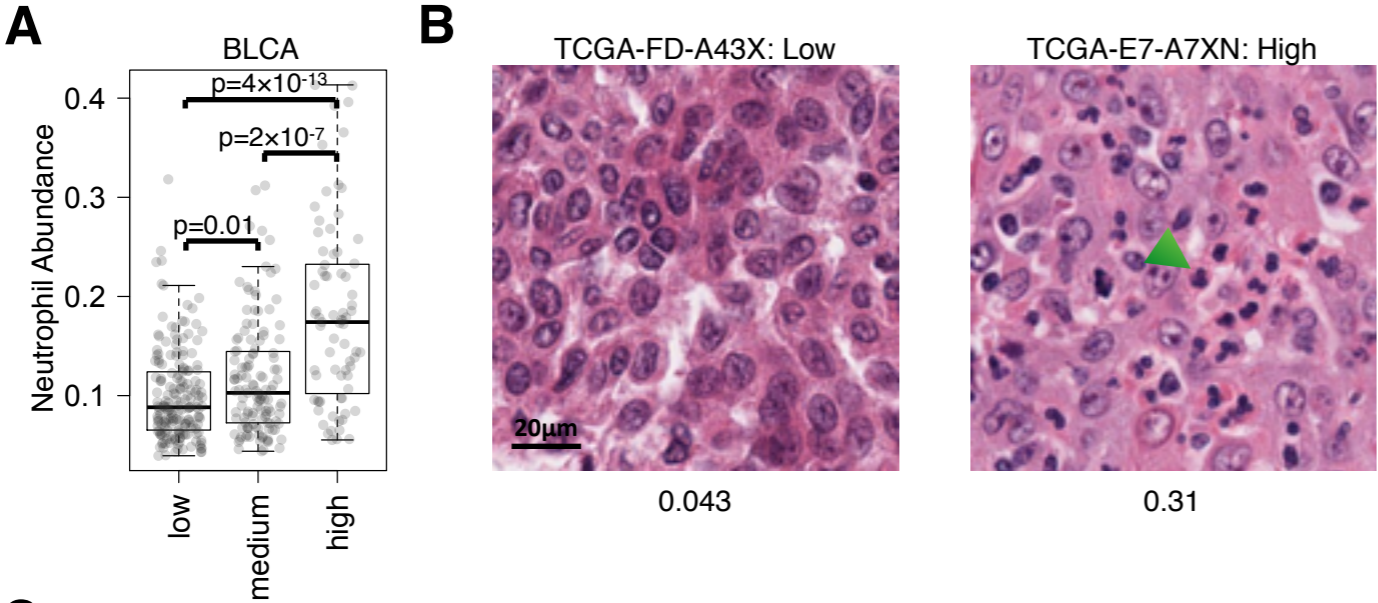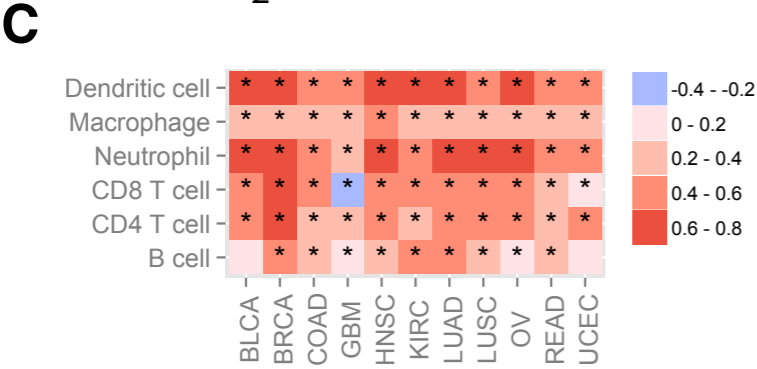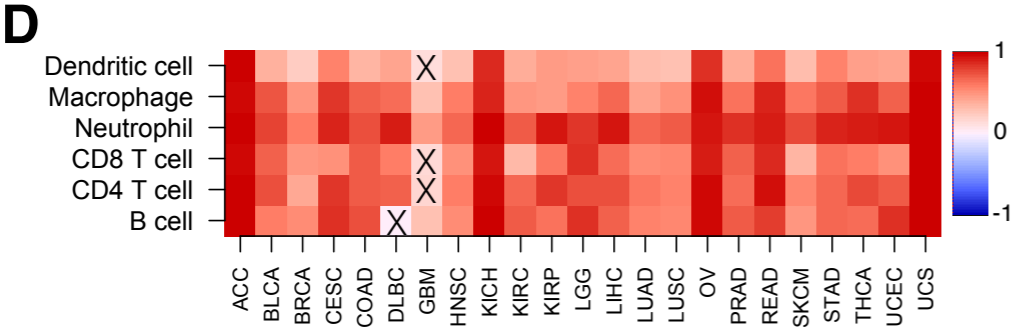

Figure S4

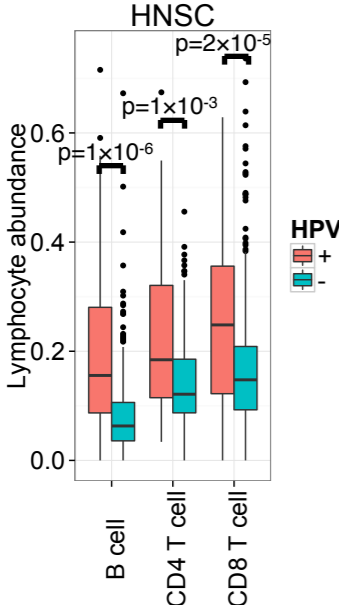

Figure S5

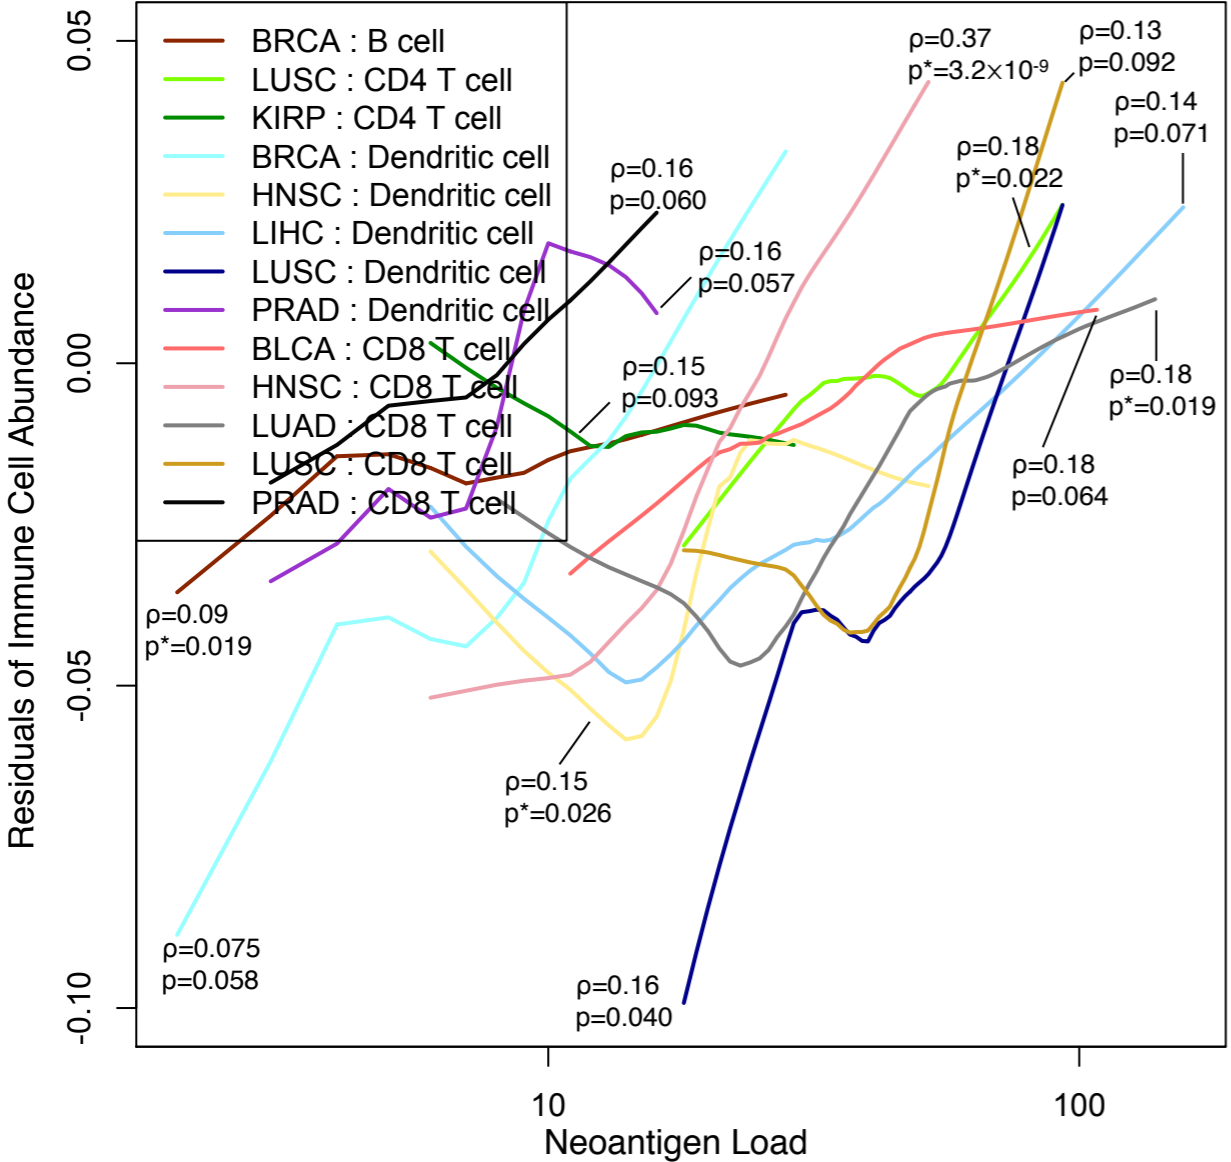

Figure S6

A

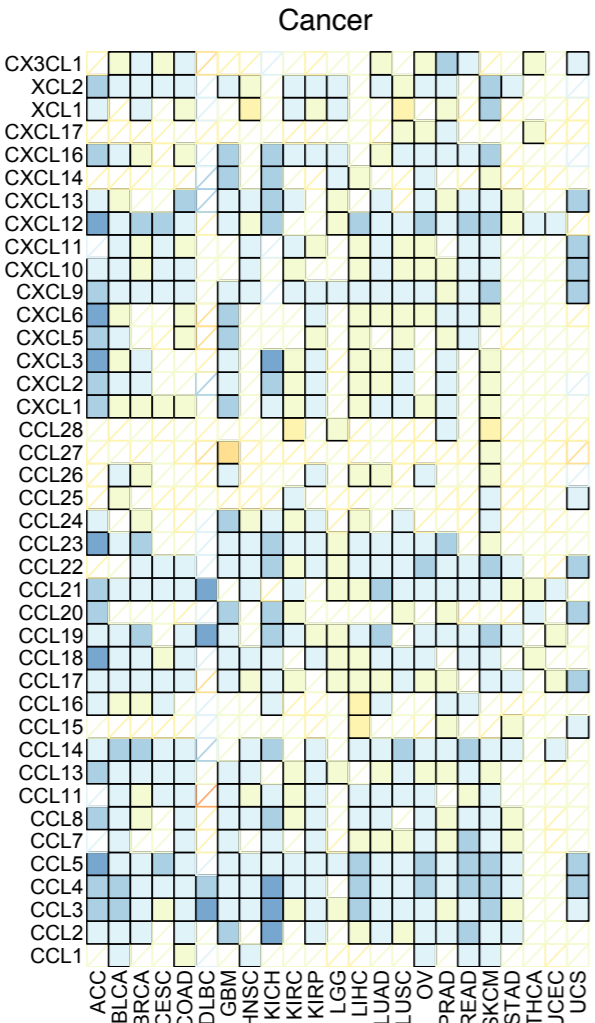

B

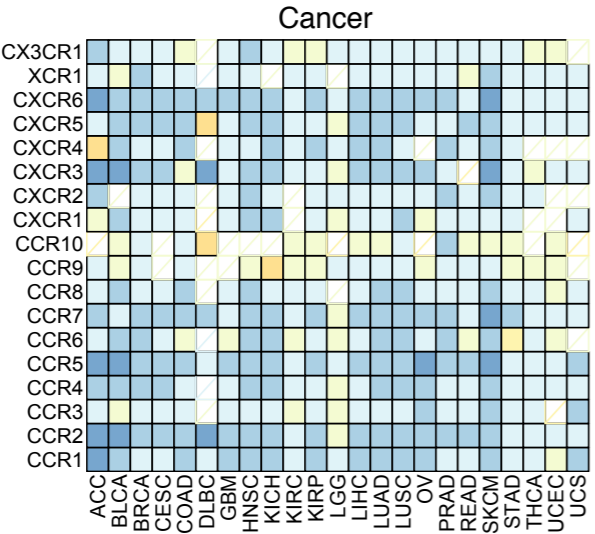

C

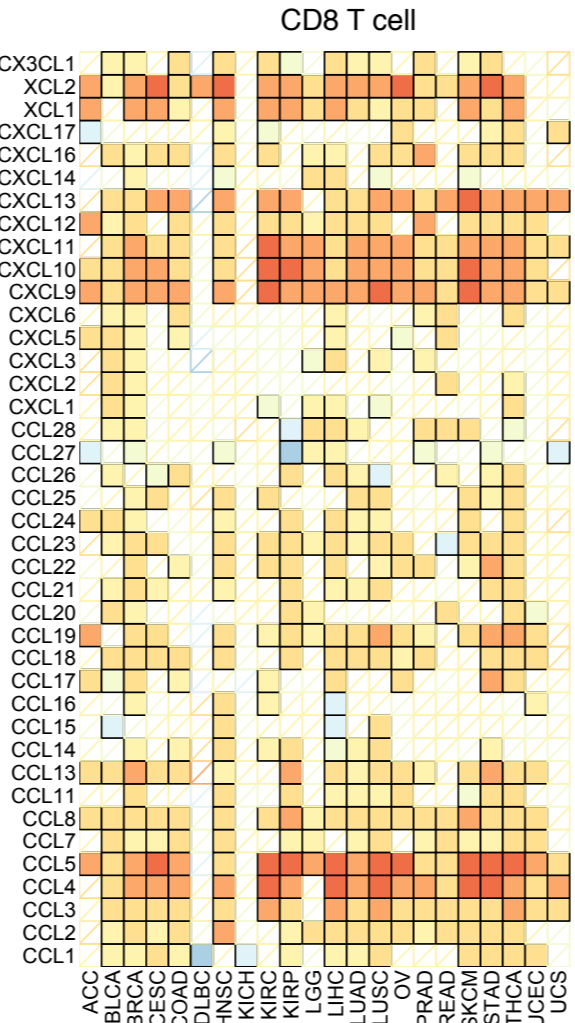

D

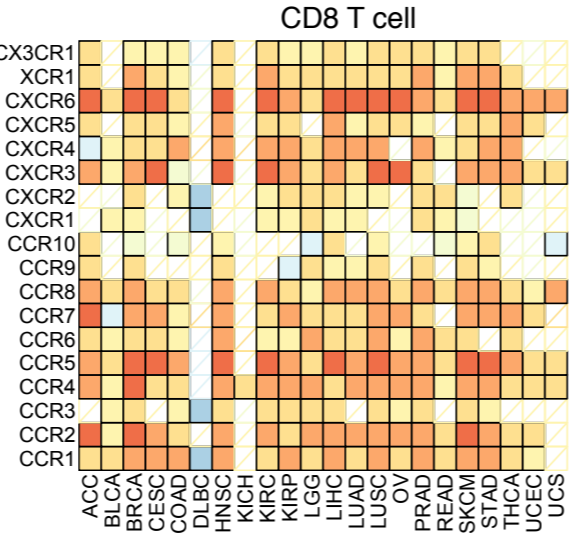

Macrophage

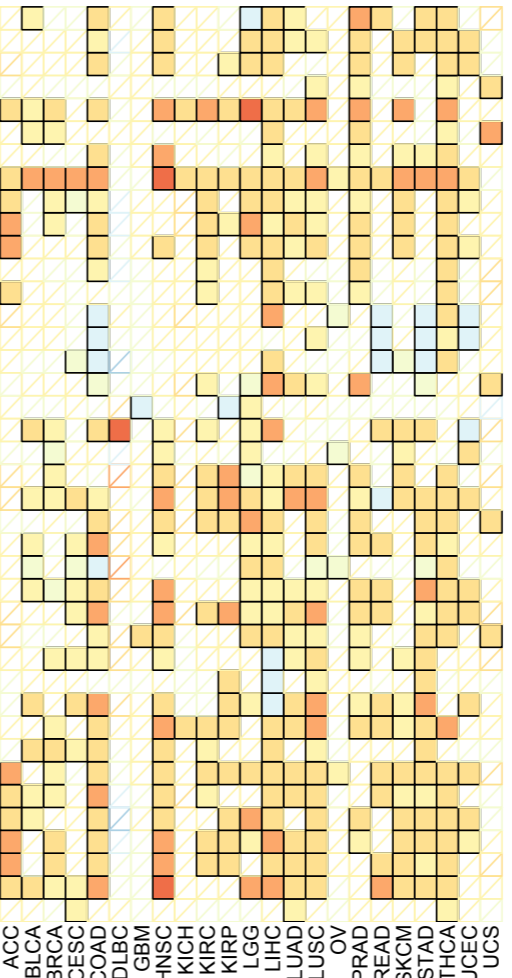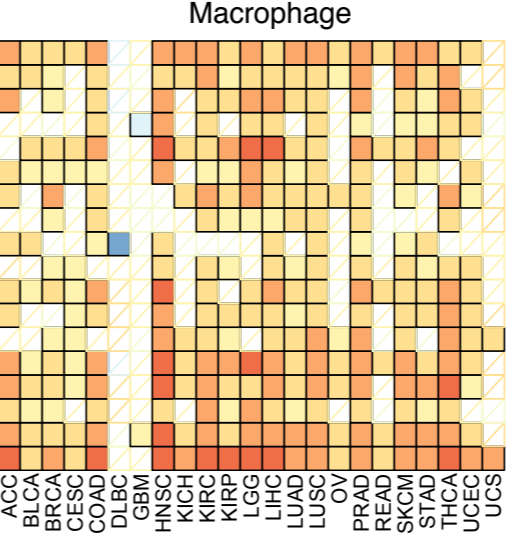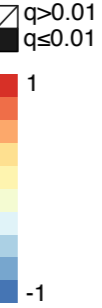



Figure S8

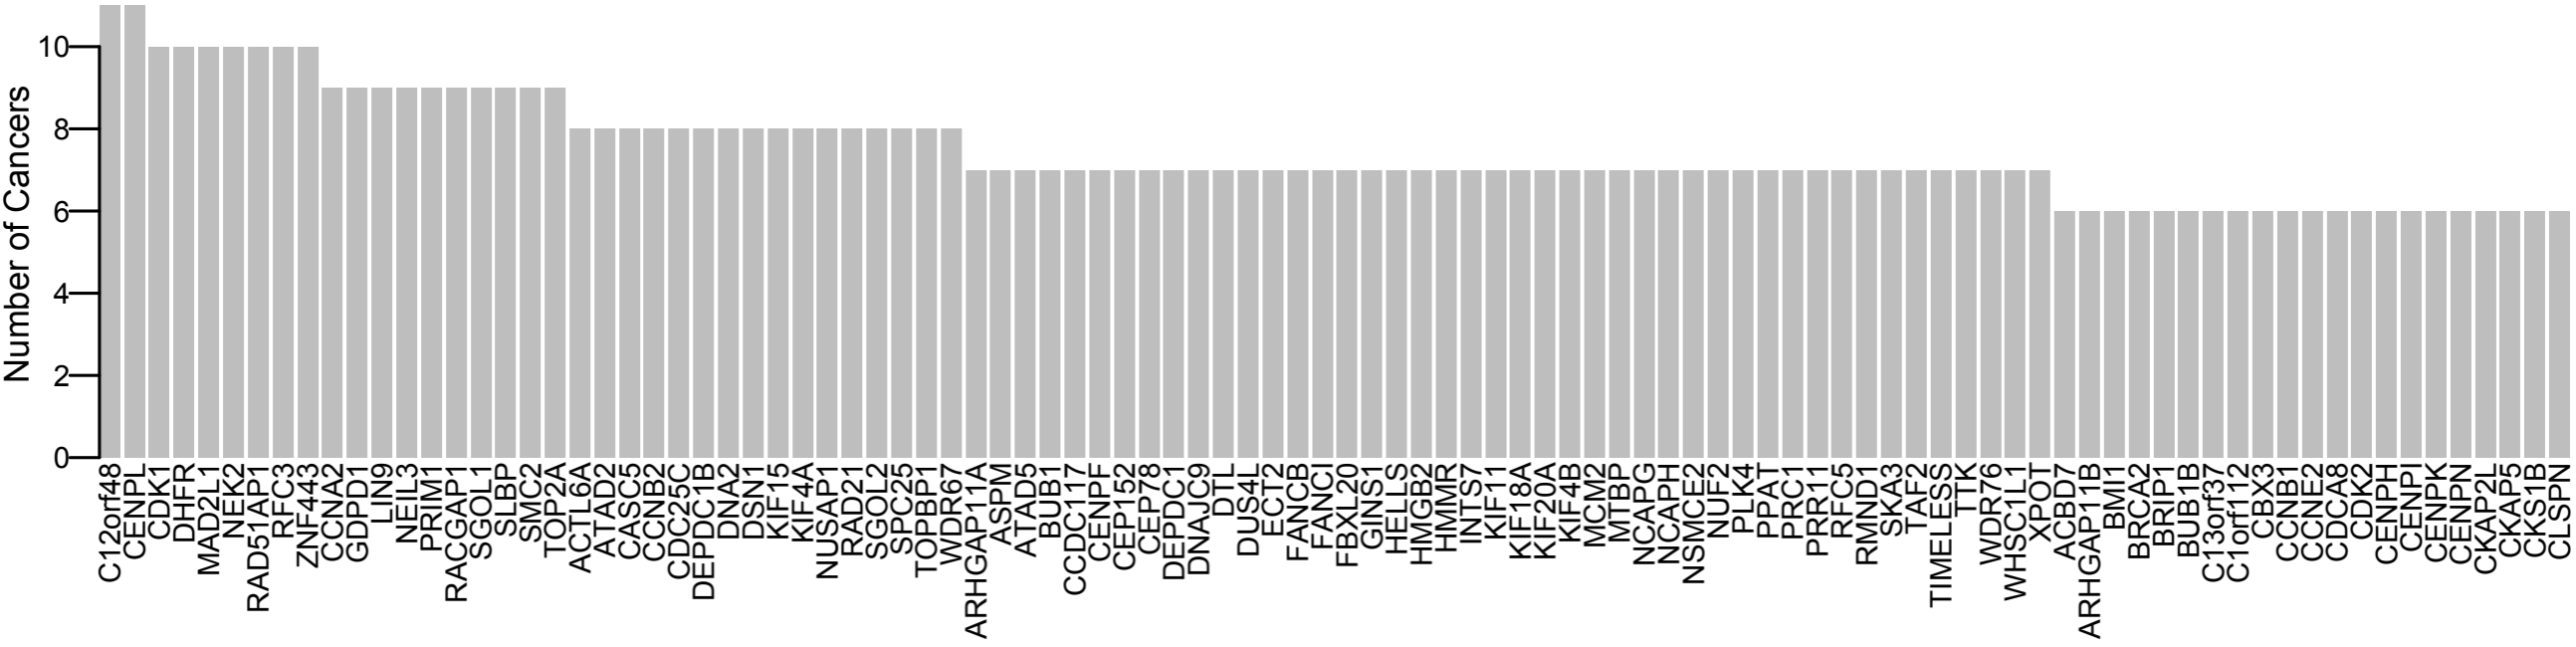





**Figure S10**

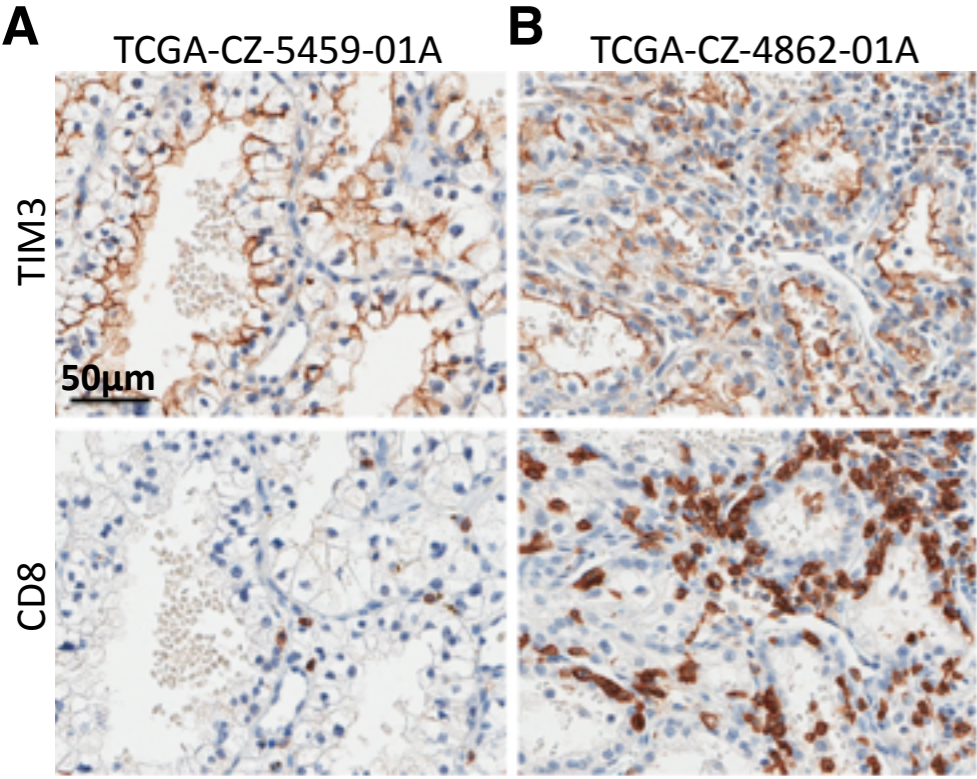

Supplement: 13059_2016_1028_MOESM1_ESM.pdf [file 13059_2016_1028_MOESM1_ESM.pdf]
